# Supplementary material for: Quantitative proteomics of epigenetic histone modifications in MCF-7 cells under estradiol stimulation
Source: Royal Society of Chemistry journal article supplement (doi:10.1039/d0ay02146f), 2020-12-18
Supplement: d0ay02146f3.pdf [file d0ay02146f3.pdf]

Table S1. 49 histone variants were identified with high sequence coverage through LC-MS/MS analysis

| Uniprot IDs | Protein Name | Sequence Coverage | Protein Description                                              | Ratio E2+/E2- | RSD   |
|-------------|--------------|-------------------|------------------------------------------------------------------|---------------|-------|
| P07305      | H10_HUMAN    | 67.5%             | Histone H1.0 OS=Homo sapiens GN=H1F0 PE=1 SV=3                   | 4.85          | 23.3% |
| Q02539      | H11_HUMAN    | 74.4%             | Histone H1.1 OS=Homo sapiens GN=HIST1H1A PE=1<br>SV=3            | 0.35          | 92.6% |
| P16403      | H12_HUMAN    | 67.1%             | Histone H1.2 OS=Homo sapiens GN=HIST1H1C PE=1<br>SV=2            | 0.73          | 80.6% |
| P16402      | H13_HUMAN    | 63.8%             | Histone H1.3 OS=Homo sapiens GN=HIST1H1D PE=1<br>SV=2            | 0.75          | 77.7% |
| P10412      | H14_HUMAN    | 69.0%             | Histone H1.4 OS=Homo sapiens GN=HIST1H1E PE=1<br>SV=2            | 0.70          | 80.3% |
| P16401      | H15_HUMAN    | 79.6%             | Histone H1.5 OS=Homo sapiens GN=HIST1H1B PE=1<br>SV=3            | 0.29          | 98.3% |
| Q75WM6      | H1FNT_HUMAN  | 7.8%              | Testis-specific H1 histone OS=Homo sapiens GN=H1FNT<br>PE=2 SV=3 | \             | \     |
| Q8IZA3      | H1FOO_HUMAN  | 5.2%              | Histone H1oo OS=Homo sapiens GN=H1FOO PE=2<br>SV=1               | \             | \     |
| P22492      | H1T_HUMAN    | 31.4%             | Histone H1t OS=Homo sapiens GN=HIST1H1T PE=2<br>SV=4             | 1.42          | 65.0% |
| Q92522      | H1X_HUMAN    | 82.6%             | Histone H1x OS=Homo sapiens GN=H1FX PE=1 SV=1                    | 1.15          | 33.2% |
| P0C0S8      | H2A1_HUMAN   | 99.2%             | Histone H2A type 1 OS=Homo sapiens GN=HIST1H2AG<br>PE=1 SV=2     | 0.57          | 26.8% |
| Q96QV6      | H2A1A_HUMAN  | 58.0%             | Histone H2A type 1-A OS=Homo sapiens                             | 0.90          | 11.2% |

|        |             |        |                                                                             |      |       |
|--------|-------------|--------|-----------------------------------------------------------------------------|------|-------|
| P04908 | H2A1B_HUMAN | 99.2%  | GN=HIST1H2AA PE=1 SV=3<br>Histone H2A type 1-B/E OS=Homo sapiens            | 0.92 | 30.2% |
| Q93077 | H2A1C_HUMAN | 100.0% | GN=HIST1H2AB PE=1 SV=2<br>Histone H2A type 1-C OS=Homo sapiens              | 0.76 | 27.6% |
| P20671 | H2A1D_HUMAN | 99.2%  | GN=HIST1H2AC PE=1 SV=3<br>Histone H2A type 1-D OS=Homo sapiens              | 1.06 | 32.6% |
| Q96KK5 | H2A1H_HUMAN | 99.2%  | GN=HIST1H2AD PE=1 SV=2<br>Histone H2A type 1-H OS=Homo sapiens              | 1.02 | 30.5% |
| Q99878 | H2A1J_HUMAN | 99.2%  | GN=HIST1H2AH PE=1 SV=3<br>Histone H2A type 1-J OS=Homo sapiens GN=HIST1H2AJ | 1.27 | 21.5% |
| Q6FI13 | H2A2A_HUMAN | 100.0% | PE=1 SV=3<br>Histone H2A type 2-A OS=Homo sapiens                           | 0.63 | 25.0% |
| Q8IUE6 | H2A2B_HUMAN | 100.0% | GN=HIST2H2AA3 PE=1 SV=3<br>Histone H2A type 2-B OS=Homo sapiens             | 0.96 | 37.8% |
| Q16777 | H2A2C_HUMAN | 100.0% | GN=HIST2H2AB PE=1 SV=3<br>Histone H2A type 2-C OS=Homo sapiens              | 0.72 | 39.7% |
| Q7L7L0 | H2A3_HUMAN  | 100.0% | GN=HIST2H2AC PE=1 SV=4<br>Histone H2A type 3 OS=Homo sapiens GN=HIST3H2A    | 0.92 | 32.0% |
| Q9BTM1 | H2AJ_HUMAN  | 96.9%  | PE=1 SV=3<br>Histone H2A.J OS=Homo sapiens GN=H2AFJ PE=1                    | 1.06 | 25.0% |
| Q71UI9 | H2AV_HUMAN  | 81.3%  | SV=1<br>Histone H2A.V OS=Homo sapiens GN=H2AFV PE=1                         | 2.12 | 49.5% |
| Q9P0M6 | H2AW_HUMAN  | 13.7%  | SV=3<br>Core histone macro-H2A.2 OS=Homo sapiens                            | \    | \     |
| P16104 | H2AX_HUMAN  | 97.2%  | GN=H2AFY2 PE=1 SV=3<br>Histone H2AX OS=Homo sapiens GN=H2AFX PE=1           | 1.06 | 50.9% |

| Accession | Gene        | Expression | Description                                                         | Score | Percentage |
|-----------|-------------|------------|---------------------------------------------------------------------|-------|------------|
| P0C0S5    | H2AZ_HUMAN  | 81.3%      | Histone H2A.Z OS=Homo sapiens GN=H2AFZ PE=1 SV=2                    | 1.21  | 30.7%      |
| Q96A08    | H2B1A_HUMAN | 52.8%      | Histone H2B type 1-A OS=Homo sapiens GN=HIST1H2BA PE=1 SV=3         | 0.99  | 10.4%      |
| P33778    | H2B1B_HUMAN | 100.0%     | Histone H2B type 1-B OS=Homo sapiens GN=HIST1H2BB PE=1 SV=2         | 0.89  | 18.0%      |
| P62807    | H2B1C_HUMAN | 100.0%     | Histone H2B type 1-C/E/F/G/I OS=Homo sapiens GN=HIST1H2BC PE=1 SV=4 | \     | \          |
| P58876    | H2B1D_HUMAN | 100.0%     | Histone H2B type 1-D OS=Homo sapiens GN=HIST1H2BD PE=1 SV=2         | 0.89  | 17.7%      |
| Q93079    | H2B1H_HUMAN | 100.0%     | Histone H2B type 1-H OS=Homo sapiens GN=HIST1H2BH PE=1 SV=3         | \     | \          |
| P06899    | H2B1J_HUMAN | 100.0%     | Histone H2B type 1-J OS=Homo sapiens GN=HIST1H2BJ PE=1 SV=3         | 1.32  | 14.0%      |
| O60814    | H2B1K_HUMAN | 100.0%     | Histone H2B type 1-K OS=Homo sapiens GN=HIST1H2BK PE=1 SV=3         | 1.04  | 20.4%      |
| Q99880    | H2B1L_HUMAN | 100.0%     | Histone H2B type 1-L OS=Homo sapiens GN=HIST1H2BL PE=1 SV=3         | 0.99  | 18.5%      |
| Q99879    | H2B1M_HUMAN | 100.0%     | Histone H2B type 1-M OS=Homo sapiens GN=HIST1H2BM PE=1 SV=3         | 0.89  | 18.3%      |
| Q99877    | H2B1N_HUMAN | 100.0%     | Histone H2B type 1-N OS=Homo sapiens GN=HIST1H2BN PE=1 SV=3         | 0.90  | 19.1%      |
| P23527    | H2B1O_HUMAN | 100.0%     | Histone H2B type 1-O OS=Homo sapiens GN=HIST1H2BO PE=1 SV=3         | 1.00  | 17.9%      |
| Q6DN03    | H2B2C_HUMAN | 48.2%      | Putative histone H2B type 2-C OS=Homo sapiens                       | 1.26  | 14.2%      |

|        |             |        |                                                                                                   |      |       |
|--------|-------------|--------|---------------------------------------------------------------------------------------------------|------|-------|
| Q6DRA6 | H2B2D_HUMAN | 56.7%  | GN=HIST2H2BC PE=5 SV=3<br>Putative histone H2B type 2-D OS=Homo sapiens<br>GN=HIST2H2BD PE=5 SV=3 | \    | \     |
| Q16778 | H2B2E_HUMAN | 100.0% | Histone H2B type 2-E OS=Homo sapiens<br>GN=HIST2H2BE PE=1 SV=3                                    | \    | \     |
| Q5QNW6 | H2B2F_HUMAN | 100.0% | Histone H2B type 2-F OS=Homo sapiens<br>GN=HIST2H2BF PE=1 SV=3                                    | 0.89 | 21.4% |
| Q8N257 | H2B3B_HUMAN | 100.0% | Histone H2B type 3-B OS=Homo sapiens<br>GN=HIST3H2BB PE=1 SV=3                                    | 0.99 | 18.2% |
| P57053 | H2BFS_HUMAN | 100.0% | Histone H2B type F-S OS=Homo sapiens GN=H2BFS<br>PE=1 SV=2                                        | 1.40 | 9.1%  |
| P68431 | H31_HUMAN   | 95.6%  | Histone H3.1 OS=Homo sapiens GN=HIST1H3A PE=1<br>SV=2                                             | 1.10 | 23.2% |
| Q16695 | H31T_HUMAN  | 72.1%  | Histone H3.1t OS=Homo sapiens GN=HIST3H3 PE=1<br>SV=3                                             | 1.01 | 15.2% |
| Q71DI3 | H32_HUMAN   | 72.1%  | Histone H3.2 OS=Homo sapiens GN=HIST2H3A PE=1<br>SV=3                                             | 1.09 | 18.3% |
| P84243 | H33_HUMAN   | 72.1%  | Histone H3.3 OS=Homo sapiens GN=H3F3A PE=1 SV=2                                                   | 1.12 | 18.4% |
| Q6NXT2 | H3C_HUMAN   | 77.8%  | Histone H3.3C OS=Homo sapiens GN=H3F3C PE=1<br>SV=3                                               | 1.05 | 23.4% |
| P62805 | H4_HUMAN    | 97.1%  | Histone H4 OS=Homo sapiens GN=HIST1H4A PE=1<br>SV=2                                               | 1.21 | 15.6% |

---
