# Supplementary material for: Quantitative proteomics of epigenetic histone modifications in MCF-7 cells under estradiol stimulation
Source: Royal Society of Chemistry journal article supplement (doi:10.1039/d0ay02146f), 2020-12-18
Supplement: d0ay02146f4.pdf [file d0ay02146f4.pdf]

Table S2. The differential expressed proteins in MCF-7 cells under estradiol stimulation in Fraction A, B and C.

| Fraction A     |               | Fraction B |               | Fraction C     |               |
|----------------|---------------|------------|---------------|----------------|---------------|
| Gene name      | Ratio E2+\E2- | Gene name  | Ratio E2+\E2- | Gene name      | Ratio E2+\E2- |
| ACBD3          | 2.09          | ACTG1      | 0.40          | ABCF1          | 1.73          |
| AHCY           | 2.42          | ADAR       | 0.58          | ACTG1          | 0.41          |
| AHNAK          | 2.06          | AKAP8      | 2.57          | ANXA4          | 0.58          |
| ANP32E         | 0.50          | ALDH3A2    | 2.05          | ANXA5          | 1.74          |
| ANXA7          | 2.39          | ALPI       | 0.23          | AP3S1          | 1.71          |
| ATP5J          | 0.58          | ANXA7      | 1.97          | ATP5A1         | 1.70          |
| ATP5J2         | 0.55          | APOB       | 0.22          | ATP5B          | 1.84          |
| CALU           | 1.93          | ATAD3A     | 0.35          | ATP5D          | 1.88          |
| CKB            | 2.78          | ATP5A1     | 1.74          | BANF1          | 2.09          |
| CPS1           | 3.28          | ATP5C1     | 2.30          | CFDP1          | 1.91          |
| CRYZ           | 0.33          | BLM        | 2.82          | CKAP4          | 1.92          |
| DARS2          | 0.47          | CAPG       | 0.45          | CLMN           | 1.94          |
| DHX15          | 1.75          | CD55       | 4.96          | COX5B          | 0.44          |
| DLD            | 0.54          | CDKN2AIP   | 3.84          | CPNE1          | 2.45          |
| EIF2S1         | 1.85          | COX7A2     | 0.51          | EEF1A2         | 0.41          |
| EIF2S3;EIF2S3L | 2.17          | COX7C      | 0.58          | EIF2S2         | 2.28          |
| EPHX1          | 2.23          | CPNE1      | 2.34          | EIF2S3;EIF2S3L | 1.84          |
| FAR1           | 0.22          | CPSF7      | 1.75          | ELAVL1         | 2.64          |
| G6PD           | 3.69          | CREBRF     | 0.18          | H1FO           | 3.36          |

|                                                                                                                                         |      |                                                   |      |          |      |
|-----------------------------------------------------------------------------------------------------------------------------------------|------|---------------------------------------------------|------|----------|------|
| GARS                                                                                                                                    | 2.30 | DBN1                                              | 2.19 | HIST1H1A | 0.09 |
| GOLT1B                                                                                                                                  | 1.83 | DPM1                                              | 1.83 | HIST1H1B | 0.02 |
| HIST1H1C;HIST1H1E;<br>HIST1H1D                                                                                                          | 0.50 | DSP                                               | 0.50 | HNRNPC   | 0.52 |
| HIST1H2AJ;HIST1H2A<br>H;H2AFJ;HIST2H2AC;<br>HIST1H2AC;HIST3H2<br>A;HIST2H2AA3;HIST1<br>H2AD;HIST1H2AG;HI<br>ST1H2AB;HIST1H2AA<br>;H2AFX | 0.49 | EEF1D                                             | 1.71 | KRT1     | 0.02 |
| HIST1H4A                                                                                                                                | 0.57 | EEF1G                                             | 2.07 | KRT10    | 0.42 |
| HK1                                                                                                                                     | 2.51 | EIF2S1                                            | 2.01 | KRT16    | 0.05 |
| HMGA1                                                                                                                                   | 0.51 | EIF2S2                                            | 2.74 | KRT17    | 0.35 |
| HMGB2                                                                                                                                   | 0.50 | EIF2S3;EIF2S3L                                    | 2.09 | KRT18    | 1.95 |
| HSPB1                                                                                                                                   | 0.10 | ELAVL1                                            | 2.34 | KRT2     | 0.05 |
| IARS                                                                                                                                    | 1.73 | FAM162A                                           | 2.09 | KRT9     | 0.03 |
| IDH3A                                                                                                                                   | 0.53 | FLOT1                                             | 1.73 | LGALS1   | 2.64 |
| IPO7                                                                                                                                    | 1.86 | FLOT2                                             | 1.71 | LIMA1    | 2.65 |
| KRT10                                                                                                                                   | 0.30 | GSN                                               | 1.71 | MRPL12   | 2.05 |
| KRT14;KRT15                                                                                                                             | 0.40 | HIST1H1C;HIST1<br>H1E;HIST1H1D;<br>HIST1H1A       | 0.57 | NOLC1    | 0.42 |
| KRT17                                                                                                                                   | 0.26 | HIST1H2AJ;HIST<br>1H2AH;H2AFJ;HI<br>ST2H2AC;HIST1 | 0.53 | PARP1    | 1.87 |

|        |      |                |      |                 |      |
|--------|------|----------------|------|-----------------|------|
|        |      | H2AC;HIST3H2A  |      |                 |      |
|        |      | ;HIST2H2AA3;HI |      |                 |      |
|        |      | ST1H2AD;HIST1  |      |                 |      |
|        |      | H2AG;HIST1H2A  |      |                 |      |
|        |      | B              |      |                 |      |
| KRT9   | 0.08 | HNRNPUL2       | 1.74 | PCNA            | 2.32 |
| LDHB   | 2.79 | HSPD1          | 0.57 | PRSS1;PRSS3P2;P | 0.04 |
|        |      |                |      | RSS2            |      |
| LGALS1 | 2.01 | IARS           | 1.78 | PSMA7;PSMA8     | 2.00 |
| LRPPRC | 0.57 | IFI16          | 0.20 | S100A4          | 0.21 |
| LSS    | 0.35 | KRT1           | 0.03 | S100A6          | 2.17 |
| MATR3  | 0.54 | KRT10          | 0.04 | S100P           | 2.36 |
| MDH2   | 0.39 | KRT17          | 0.27 | SMAP            | 2.18 |
| MGST1  | 4.82 | KRT2           | 0.04 | SRP14           | 1.94 |
| MRPL49 | 0.22 | KRT37;KRT38    | 1.84 | TSSC4           | 1.95 |
| MSMO1  | 1.81 | KRT9           | 0.05 | VDAC2           | 2.56 |
| NQO1   | 3.46 | KTNI           | 3.70 | XP32            | 0.02 |
| OSTC   | 0.51 | LIMA1          | 2.43 | ZNF177          | 3.26 |
| PAICS  | 2.24 | MGST1          | 5.92 |                 |      |
| PCNA   | 1.86 | MGST2          | 0.45 |                 |      |
| PDHA1  | 0.49 | MUC1           | 0.15 |                 |      |
| PGAM1  | 1.80 | MYH10          | 0.53 |                 |      |
| PSCA   | 3.66 | MYO1E          | 0.58 |                 |      |
| PSMB5  | 1.75 | NDUFA12        | 0.58 |                 |      |
| RAB10  | 0.53 | NDUFA5         | 0.54 |                 |      |
| RECQL  | 2.31 | NDUFB9         | 0.57 |                 |      |

|                 |      |              |      |
|-----------------|------|--------------|------|
| S100P           | 1.86 | NOLC1        | 0.47 |
| SLC30A7         | 0.41 | NSA2         | 0.47 |
| SLIRP           | 0.58 | NUP210       | 0.49 |
| SMARCAL1        | 7.03 | NUP50        | 0.41 |
| SMARCC1;SMARCC2 | 0.46 | PPP1CC       | 0.45 |
| SPTAN1          | 0.49 | PSMD13       | 2.05 |
| SPTBN1          | 0.52 | QARS         | 2.13 |
| SRSF3           | 0.47 | RARS         | 1.78 |
| TAF15           | 0.49 | RECQL        | 3.15 |
| TMEM97          | 2.24 | S100A4       | 0.15 |
| TRIP13          | 1.74 | SEC22B       | 2.08 |
| TXNRD1          | 4.41 | SP100;SP140L | 0.56 |
| USP14           | 0.46 | SPTBN1       | 0.55 |
| VCP             | 1.78 | SURF1        | 0.59 |
| YWHAQ           | 2.69 | TCOF1        | 0.58 |
|                 |      | TMED10       | 1.88 |
|                 |      | TMED2        | 1.86 |
|                 |      | TMED7        | 3.59 |
|                 |      | TMEM43       | 0.45 |
|                 |      | TMX2         | 2.62 |
|                 |      | TOP2A        | 0.56 |
|                 |      | TUBAL3       | 2.68 |
|                 |      | UQCRB        | 0.49 |
|                 |      | UQCRC2       | 0.31 |
|                 |      | USP7         | 1.75 |
|                 |      | VDAC2        | 2.49 |

|       |      |
|-------|------|
| VDAC3 | 2.12 |
| XPC   | 0.54 |
