# Supplementary material for: Quantitative proteomics of epigenetic histone modifications in MCF-7 cells under estradiol stimulation
Source: Royal Society of Chemistry journal article supplement (doi:10.1039/d0ay02146f), 2020-12-18
Supplement: d0ay02146f5.pdf [file d0ay02146f5.pdf]

Table S3. The pathway list of differential proteins in various fractions in MCF-7 cells under estradiol stimulation

| Pathways                                                   | Gene list                                                              | Enrichment p-value | Depletion p-value | Fraction |
|------------------------------------------------------------|------------------------------------------------------------------------|--------------------|-------------------|----------|
| Pyruvate metabolism and TCA cycle<br>(ReactomeREACT_1046)  | DLD IDH3A LDHB MDH2 PDHA1                                              | 1.42E-04           | 1.00E+00          | A        |
| Citrate cycle (TCA cycle) (KEGG 00020)                     | DLD IDH3A MDH2 PDHA1                                                   | 6.36E-04           | 9.99E-01          | A        |
| Glycolysis / Gluconeogenesis (KEGG 00010)                  | DLD HK1 LDHB PDHA1 PGAM1                                               | 8.73E-04           | 9.99E-01          | A        |
| Pyruvate metabolism (KEGG 00620)                           | DLD LDHB MDH2 PDHA1                                                    | 1.50E-03           | 9.99E-01          | A        |
| Metabolism of carbohydrates<br>(ReactomeREACT_474)         | DLD G6PD HK1 LDHB MDH2 PDHA1<br>PGAM1                                  | 1.91E-03           | 9.98E-01          | A        |
| Valine, leucine and isoleucine biosynthesis<br>(KEGG00290) | IARS PDHA1                                                             | 8.02E-03           | 9.92E-01          | A        |
| Parkinson's disease (KEGG 05012)                           | ATP5A1 ATP5C1 COX7A2 COX7C<br>NDUFA5 NDUFB9 UQCRB<br>UQCRC2VDAC2 VDAC3 | 3.23E-05           | 1.00E+00          | B        |
| Huntington's disease (KEGG 05016)                          | ATP5A1 ATP5C1 COX7A2 COX7C<br>NDUFA5 NDUFB9 UQCRB<br>UQCRC2VDAC2 VDAC3 | 5.07E-04           | 1.00E+00          | B        |
| Oxidative phosphorylation (KEGG 00190)                     | ATP5A1 ATP5C1 COX7A2 COX7C<br>NDUFA5 NDUFB9 UQCRB UQCRC2               | 1.06E-03           | 9.99E-01          | B        |

|                                                       |                                                          |          |          |   |
|-------------------------------------------------------|----------------------------------------------------------|----------|----------|---|
| Alzheimer's disease (KEGG 05010)                      | ATP5A1 ATP5C1 COX7A2 COX7C<br>NDUFA5 NDUFB9 UQCRB UQCRC2 | 4.36E-03 | 9.96E-01 | B |
| Aminoacyl-tRNA biosynthesis (KEGG 00970)              | IARS QARS RARS                                           | 2.52E-02 | 9.75E-01 | B |
| Cardiac muscle contraction (KEGG 04260)               | COX7A2 COX7C UQCRB UQCRC2                                | 3.50E-02 | 9.65E-01 | B |
| Parkinson's disease (KEGG 05012)                      | ATP5A1 ATP5B ATP5D COX5B<br>VDAC2                        | 0.004967 | 0.995    | C |
| Huntington's disease (KEGG 05016)                     | ATP5A1 ATP5B ATP5D COX5B<br>VDAC2                        | 0.01914  | 0.9809   | C |
| Oxidative phosphorylation (KEGG 00190)                | ATP5A1 ATP5B ATP5D COX5B                                 | 0.0266   | 0.9734   | C |
| Base excision repair (KEGG 03410)                     | PARP1 PCNA                                               | 0.03507  | 0.9649   | C |
| Alzheimer's disease (KEGG 05010)                      | ATP5A1 ATP5B ATP5D COX5B                                 | 0.05368  | 0.9463   | C |
| Metablism of nucleotides (Reactome<br>REACT_1698)     | ATP5A1 ATP5B ATP5D                                       | 0.08171  | 0.9183   | C |
| Pathogenic Escherichia coli infection (KEGG<br>05130) | ACTG1 KRT18                                              | 0.08888  | 0.9111   | C |

---
