# Supplementary material for: Quantitative proteomics of epigenetic histone modifications in MCF-7 cells under estradiol stimulation
Source: Royal Society of Chemistry journal article supplement (doi:10.1039/d0ay02146f), 2020-12-18
Supplement: d0ay02146f6.pdf [file d0ay02146f6.pdf]

Table S4. The differential histone H1 PTMs sites list in MCF-7 cells under estradiol stimulation

| Protein IDs | Protein name | Sequence                                   | Sequence begin | Acetyl sites | Methyl sites | Dimethyl sites | Trimethyl sites | Phospho sites | Ratio E2+ \ E2- | RSD(%) |
|-------------|--------------|--------------------------------------------|----------------|--------------|--------------|----------------|-----------------|---------------|-----------------|--------|
| P07305      | H10          | ASKKSTDHPKYSDMIVAAIQAEKNRAGS<br>SR         | 18             |              | 27           |                |                 |               | 4.82            | \      |
| P07305      | H10          | KSTDHPKYSDMIVAAIQAEKNRAGSSR                | 21             |              | 27           |                |                 |               | 4.34            | \      |
| P16403      | H12          | SETAPAAPAAAPPAEKAPVK                       | 2              | 17           |              |                |                 |               | 0.25            | 18.4   |
| P16403      | H12          | SETAPAAPAAAPPAEKAPVK                       | 2              | 21           |              |                |                 |               | 0.27            | \      |
| P16403      | H12          | SETAPAAPAAAPPAEK                           | 2              |              |              |                |                 | 4             | 0.60            | 2.2    |
| P16403      | H12          | SGVSLAALKKALAAAGYDVEKNNSRIKL<br>GLK        | 55             |              |              | 64 75 79       | 63 81 85        |               | 0.25            | 0.0    |
| P16402      | H13          | SGVSLAALKKALAAAGYDVEKNNSRIKL<br>GLK        | 56             |              |              | 65 76 80       | 64 82 86        |               | 0.25            | \      |
| P16402      | H13          | LGLKSLVSKGTLVQTKGTGASGSFKLNK<br>KAASGEGKPK | 83             |              | 118          |                |                 |               | 0.16            | 16.9   |
| P16402      | H13          | SLVSKGTLVQTKGTGASGSFKLNKKAAS<br>GEGKPKAK   | 87             |              | 118          |                |                 |               | 0.18            | 14.1   |
| P16402      | H13          | SLVSKGTLVQTKGTGASGSFKLNKKAAS<br>GEGKPK     | 87             |              | 118          |                |                 |               | 0.18            | 10.4   |
| P16402      | H13          | GTLVQTKGTGASGSFKLNKKAASGEGKP<br>KAK        | 92             |              | 118          |                |                 |               | 0.17            | 6.5    |
| P16402      | H13          | GTLVQTKGTGASGSFKLNKKAASGEGKP<br>K          | 92             |              | 118          |                |                 |               | 0.22            | 6.7    |
| P16402      | H13          | GTGASGSFKLNKKAASGEGKPKAK                   | 99             |              | 118          |                |                 |               | 0.19            | 18.9   |

|        |     |                           |    |    |     |   |      |     |
|--------|-----|---------------------------|----|----|-----|---|------|-----|
| P16402 | H13 | GTGASGSFKLNKKAASGEGKPKAKK | 99 |    | 118 |   | 0.22 | \   |
| P16402 | H13 | GTGASGSFKLNKKAASGEGKPK    | 99 |    | 118 |   | 0.24 | 3.6 |
| P10412 | H14 | SETAPAAPAAPAPAEKTPVK      | 2  | 17 |     |   | 0.47 | \   |
| P10412 | H14 | SETAPAAPAAPAPAEK          | 2  |    |     | 4 | 0.60 | 2.2 |

---
