# Supplementary material for: Quantitative proteomics of epigenetic histone modifications in MCF-7 cells under estradiol stimulation
Source: Royal Society of Chemistry journal article supplement (doi:10.1039/d0ay02146f), 2020-12-18
Supplement: d0ay02146f7.pdf [file d0ay02146f7.pdf]

Table S5. The differential histone H2A PTMs sites list in MCF-7 cells under estradiol stimulation

| Protein IDs | Protein name | Sequence                                      | Sequence begin | Acetyl sites | Methyl sites | Dimethyl sites | Trimethyl sites | Phospho sites | Ratio (E2+\E2-) | RSD (%) |
|-------------|--------------|-----------------------------------------------|----------------|--------------|--------------|----------------|-----------------|---------------|-----------------|---------|
| P0C0S8      | H2A1         | NDEELNKLLGKVTIAQGGVLPNIQA<br>VLLPKKTESHHKAKGK | 90             | 126          | 100          | 128            |                 |               | 0.59            | \       |
| P04908      | H2A1B        | NDEELNKLLGRVTIAQGGVLPNIQA<br>VLLPKKTESHHKAKGK | 90             | 126          | 130          | 100            |                 |               | 0.36            | 9.8     |
| P04908      | H2A1B        | NDEELNKLLGRVTIAQGGVLPNIQA<br>VLLPKKTESHHKAKGK | 90             |              |              | 100            |                 |               | 0.42            | 34.3    |
| P04908      | H2A1B        | NDEELNKLLGRVTIAQGGVLPNIQA<br>VLLPKKTESHHKAKGK | 90             | 128          | 130          | 100            |                 |               | 0.49            | 33.3    |
| Q8IU6       | H2A2B        | NDEELNKLLGGVTIAQGGVLPNIQA<br>VLLPKKTESHKPGKNK | 90             | 128          | 130          |                |                 |               | 0.27            | 7.0     |
| Q16777      | H2A2C        | AKAKSR                                        | 13             |              | 18           |                |                 |               | 1.65            | 3.9     |
| Q16777      | H2A2C        | NDEELNKLLGKVTIAQGGVLPNIQA<br>VLLPKKTESHKAKSK  | 90             | 119          | 120          |                |                 | 128           | 2.31            | \       |
| Q7L7L0      | H2A3         | VTIAQGGVLPNIQAVLLPKKTESHH<br>KAKGK            | 101            | 119          | 126          |                |                 |               | 0.58            | \       |
| Q9BTM1      | H2AJ         | NDEELNKLLGKVTIAQGGVLPNIQA<br>VLLPKKTESQKTKSK  | 90             | 125          |              |                | 120             |               | 0.52            | \       |
| Q71UI9      | H2AV         | AGGKAGKDSGKAKAKAVSR                           | 2              | 12           |              |                |                 |               | 4.09            | 4.3     |
| Q71UI9      | H2AV         | AGGKAGKDSGKAKAKAVSR                           | 2              | 5            | 12           |                |                 |               | 4.14            | 1.1     |
| Q71UI9      | H2AV         | AGGKAGKDSGKAKAKAVSR                           | 2              | 14           |              |                |                 |               | 4.15            | 3.0     |

|        |      |                                             |    |         |    |     |      |      |
|--------|------|---------------------------------------------|----|---------|----|-----|------|------|
| Q71UI9 | H2AV | AGGKAGKDSGKAKAKAVSR                         | 2  | 5       |    |     | 4.18 | 7.8  |
| Q71UI9 | H2AV | AGGKAGKDSGKAKAKAVSR                         | 2  | 8       |    |     | 4.23 | 32.4 |
| Q71UI9 | H2AV | AGGKAGKDSGKAKAKAVSR                         | 2  | 8 12    |    |     | 4.25 | 4.4  |
| Q71UI9 | H2AV | AGGKAGKDSGKAKAKAVSR                         | 2  | 5 8     |    |     | 4.39 | 3.6  |
| Q71UI9 | H2AV | GDEELDSLKATIAGGGVIPHIHKS<br>LI<br>GKKGQQKTA | 93 |         |    | 102 | 0.27 | \    |
| P0C0S5 | H2AZ | AGGKAGKDSGKAKTKAVSR                         | 2  | 5 8 12  |    |     | 1.75 | 2.6  |
| P0C0S5 | H2AZ | AGGKAGKDSGKAKTKAVSR                         | 2  | 8 12 14 |    |     | 1.76 | \    |
| P0C0S5 | H2AZ | AGGKAGKDSGKAKTKAVSR                         | 2  | 5       | 12 |     | 1.79 | 39.2 |
| P0C0S5 | H2AZ | AGGKAGKDSGKAKTKAVSR                         | 2  | 12      |    |     | 2.12 | 3.2  |
| P0C0S5 | H2AZ | AGGKAGKDSGKAKTKAVSR                         | 2  | 5 12    |    |     | 2.32 | 24.9 |
| P0C0S5 | H2AZ | AGGKAGKDSGKAKTKAVSR                         | 2  | 5 8     |    |     | 2.34 | 17.9 |
| P0C0S5 | H2AZ | AGGKAGKDSGKAKTKAVSR                         | 2  | 5       |    |     | 2.37 | 30.5 |
| P0C0S5 | H2AZ | AGGKAGKDSGKAKTKAVSR                         | 2  | 8       |    |     | 2.42 | 31.8 |
| P0C0S5 | H2AZ | AGGKAGKDSGKAKTKAVSR                         | 2  | 8 12    |    |     | 2.50 | 20.8 |
| P0C0S5 | H2AZ | AGGKAGKDSGKAKTKAVSR                         | 2  | 8 12    | 5  | 16  | 4.94 | 4.4  |
| P0C0S5 | H2AZ | AGGKAGKDSGKAKTKAVSR                         | 2  | 5       |    | 12  | 5.15 | \    |
| P0C0S5 | H2AZ | GDEELDSLKATIAGGGVIPHIHKS<br>LI<br>GKKGQQKTV | 93 | 116 121 |    | 102 | 0.27 | \    |

---
