# Supplementary material for: Quantitative proteomics of epigenetic histone modifications in MCF-7 cells under estradiol stimulation
Source: Royal Society of Chemistry journal article supplement (doi:10.1039/d0ay02146f), 2020-12-18
Supplement: d0ay02146f9.pdf [file d0ay02146f9.pdf]

Table S7. The differential histone H3 PTMs sites list in MCF-7 cells under estradiol stimulation

| Protein IDs | Protein name | Sequence                                  | Sequence begin<br>(no M) | Acetyl sites<br>(no M) | Methyl sites<br>(no M) | Dimethyl sites<br>(no M) | Phospho sites<br>(no M) | Ratio<br>E2+\E2 | RSD (<br>%) |
|-------------|--------------|-------------------------------------------|--------------------------|------------------------|------------------------|--------------------------|-------------------------|-----------------|-------------|
| P68431      | H31          | FQSSAVMALQEACEAY<br>LVGLFEDTNLCAIHAK<br>R | 84                       | 115                    | 116                    |                          | 99                      | 0.57            | \           |
| Q71DI3      | H32          | KSAPATGGVKKPHR                            | 27                       |                        |                        | 36                       |                         | 0.61            | 11.4        |
| Q71DI3      | H32          | KQLATKAAR                                 | 18                       | 18                     | 23                     |                          |                         | 1.92            | 3.2         |
