# Supplementary material for: Quantitative proteomics of epigenetic histone modifications in MCF-7 cells under estradiol stimulation
Source: Royal Society of Chemistry journal article supplement (doi:10.1039/d0ay02146f), 2020-12-18
Supplement: d0ay02146f10.pdf [file d0ay02146f10.pdf]

Table S8. The differential histone H4 PTMs sites list in MCF-7 cells under estradiol stimulation

| Sequence          | Sequence begin (no M) | Acetyl sites (no M) | Methyl sites (no M) | Ratio E2+\\E2- | RSD (%) |
|-------------------|-----------------------|---------------------|---------------------|----------------|---------|
| SGRGKGGKGLGKGGAKR | 1                     | 5 16                |                     | 2.04           | 5.2     |
| SGRGKGGKGLGKGGAKR | 1                     | 8 16                |                     | 2.10           | 0.5     |
| GKGGKGLGKGGAKR    | 4                     | 5 16                |                     | 1.68           | 8.6     |
| GKGGKGLGKGGAKR    | 4                     | 8                   |                     | 1.68           | 32.3    |
| GKGGKGLGKGGAKR    | 4                     | 8 12                |                     | 1.80           | 7.5     |
| GKGGKGLGKGGAKR    | 4                     | 12 16               |                     | 1.80           | 8.8     |
| GKGGKGLGKGGAKR    | 4                     | 8 16                |                     | 1.90           | 13.4    |

|                  |    |           |    |      |     |
|------------------|----|-----------|----|------|-----|
| GKGGKGLGKGGAKR   | 4  | 5 12      |    | 1.94 | 6.8 |
| GKGGKGLGKGGAKR   | 4  | 5 12 16   |    | 2.14 | 9.6 |
| GKGGKGLGKGGAKR   | 4  | 8 12 16   |    | 2.16 | 3.8 |
| GKGGKGLGKGGAKR   | 4  | 5 8 16    |    | 2.19 | 2.0 |
| GKGGKGLGKGGAKR   | 4  | 5 8 12 16 |    | 2.38 | 6.5 |
| KVLRDNIQGITKPAIR | 20 | 20        | 23 | 0.51 | 5.1 |

---
