# Supplementary material for: Quantitative proteomics of epigenetic histone modifications in MCF-7 cells under estradiol stimulation
Source: Royal Society of Chemistry journal article supplement (doi:10.1039/d0ay02146f), 2020-12-18
Supplement: d0ay02146f11.pdf [file d0ay02146f11.pdf]

Table S9. The quantification results of histone PTMs related enzymes in different fractions in MCF-7 cells under estradiol stimulation

| Gene names  | Protein names                                                                                                 | Ratio E2+\E2- | Fraction |
|-------------|---------------------------------------------------------------------------------------------------------------|---------------|----------|
| ACAT1       | Acetyl-CoA acetyltransferase, mitochondrial                                                                   | 0.61755       | A        |
| CARM1       | Histone-arginine methyltransferase CARM1                                                                      | 0.61577       | A        |
| GALNT2      | Polypeptide N-acetylgalactosaminyltransferase 2; Polypeptide N-acetylgalactosaminyltransferase 2 soluble form | 0.69286       | A        |
| GALNT6      | Polypeptide N-acetylgalactosaminyltransferase 6                                                               | 1.9085        | A        |
| HAT1        | Histone acetyltransferase type B catalytic subunit                                                            | 1.4559        | A        |
| HDAC1;HDAC2 | Histone deacetylase 1;Histone deacetylase 2                                                                   | 0.60503       | A        |

|         |                                                                                                       |         |   |
|---------|-------------------------------------------------------------------------------------------------------|---------|---|
| KDM2A   | Lysine-specific demethylase 2A                                                                        | 1.1422  | A |
| KDM5A   | Lysine-specific demethylase 5A                                                                        | 1.0368  | A |
| METTL7A | Methyltransferase-like protein 7A                                                                     | 0.47642 | A |
| NAA15   | N-alpha-acetyltransferase 15, NatA auxiliary subunit                                                  | 0.8973  | A |
| NAA30   | N-alpha-acetyltransferase 30                                                                          | 2.3746  | A |
| NAA50   | N-alpha-acetyltransferase 50                                                                          | 0.79362 | A |
| PRMT1   | Protein arginine N-methyltransferase 1                                                                | 1.0011  | A |
| PRMT5   | Protein arginine N-methyltransferase 5;Protein arginine N-methyltransferase 5, N-terminally processed | 1.0128  | A |

|           |                                                                  |         |   |
|-----------|------------------------------------------------------------------|---------|---|
| EHMT2     | Histone-lysine N-methyltransferase EHMT2                         | 1.0615  | B |
| GALNT2    | Polypeptide N-acetylgalactosaminyltransferase                    | 1.1344  | B |
| HDAC1     | Histone deacetylase 1                                            | 1.2058  | B |
| HDAC2     | Histone deacetylase 2                                            | 1.7544  | B |
| KAT7      | Histone acetyltransferase KAT7                                   | 0.67155 | B |
| KDM1A     | Lysine-specific histone demethylase 1A                           | 1.5044  | B |
| NAT10     | N-acetyltransferase 10                                           | 0.8439  | B |
| PHF2;PHF8 | Lysine-specific demethylase PHF2;Histone lysine demethylase PHF8 | 0.90412 | B |

|       |                                           |         |   |
|-------|-------------------------------------------|---------|---|
| PRMT1 | Protein arginine N-methyltransferase 1    | 0.84721 | B |
| PRMT5 | Protein arginine N-methyltransferase 5    | 1.2258  | B |
| SAP18 | Histone deacetylase complex subunit SAP18 | 0.64229 | B |
| KDM1A | Lysine-specific histone demethylase 1A    | 1.5918  | C |
| SAP18 | Histone deacetylase complex subunit SAP18 | 1.0866  | C |

---
