# Supplementary figures and images for: Quantitative proteomics of epigenetic histone modifications in MCF-7 cells under estradiol stimulation
Source: Royal Society of Chemistry journal article supplement (doi:10.1039/d0ay02146f), 2020-12-18

**A**

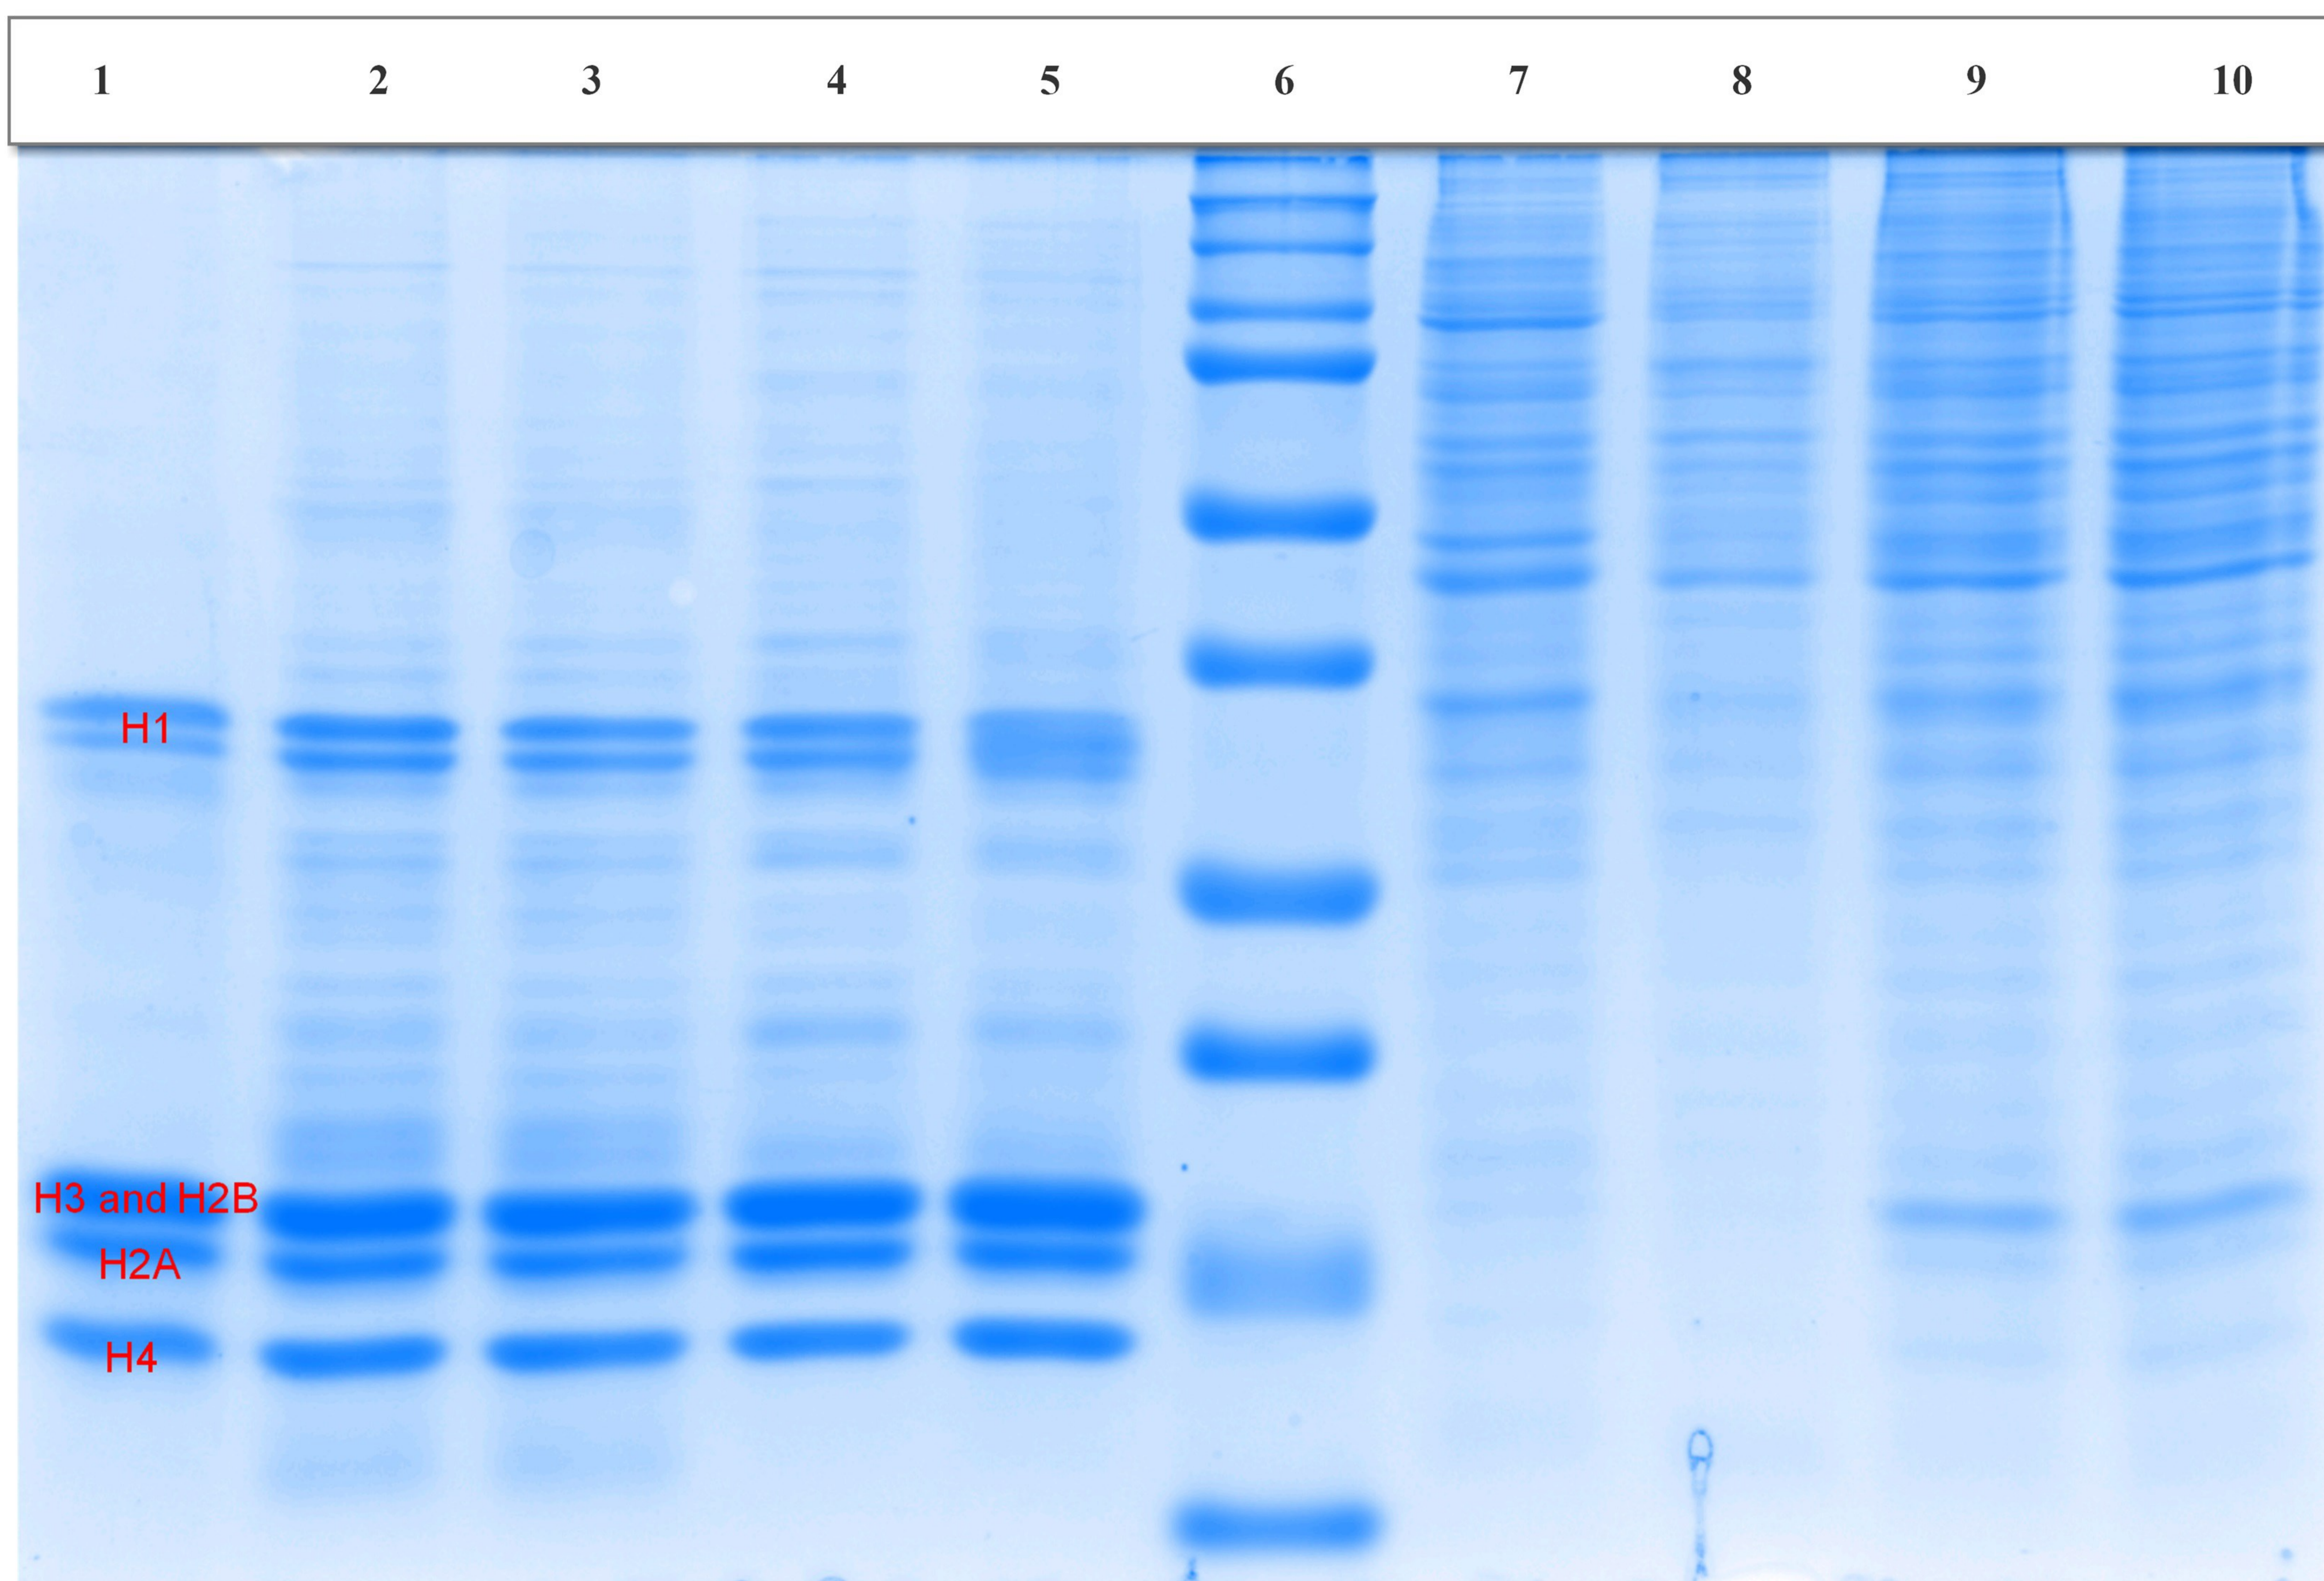

**B**

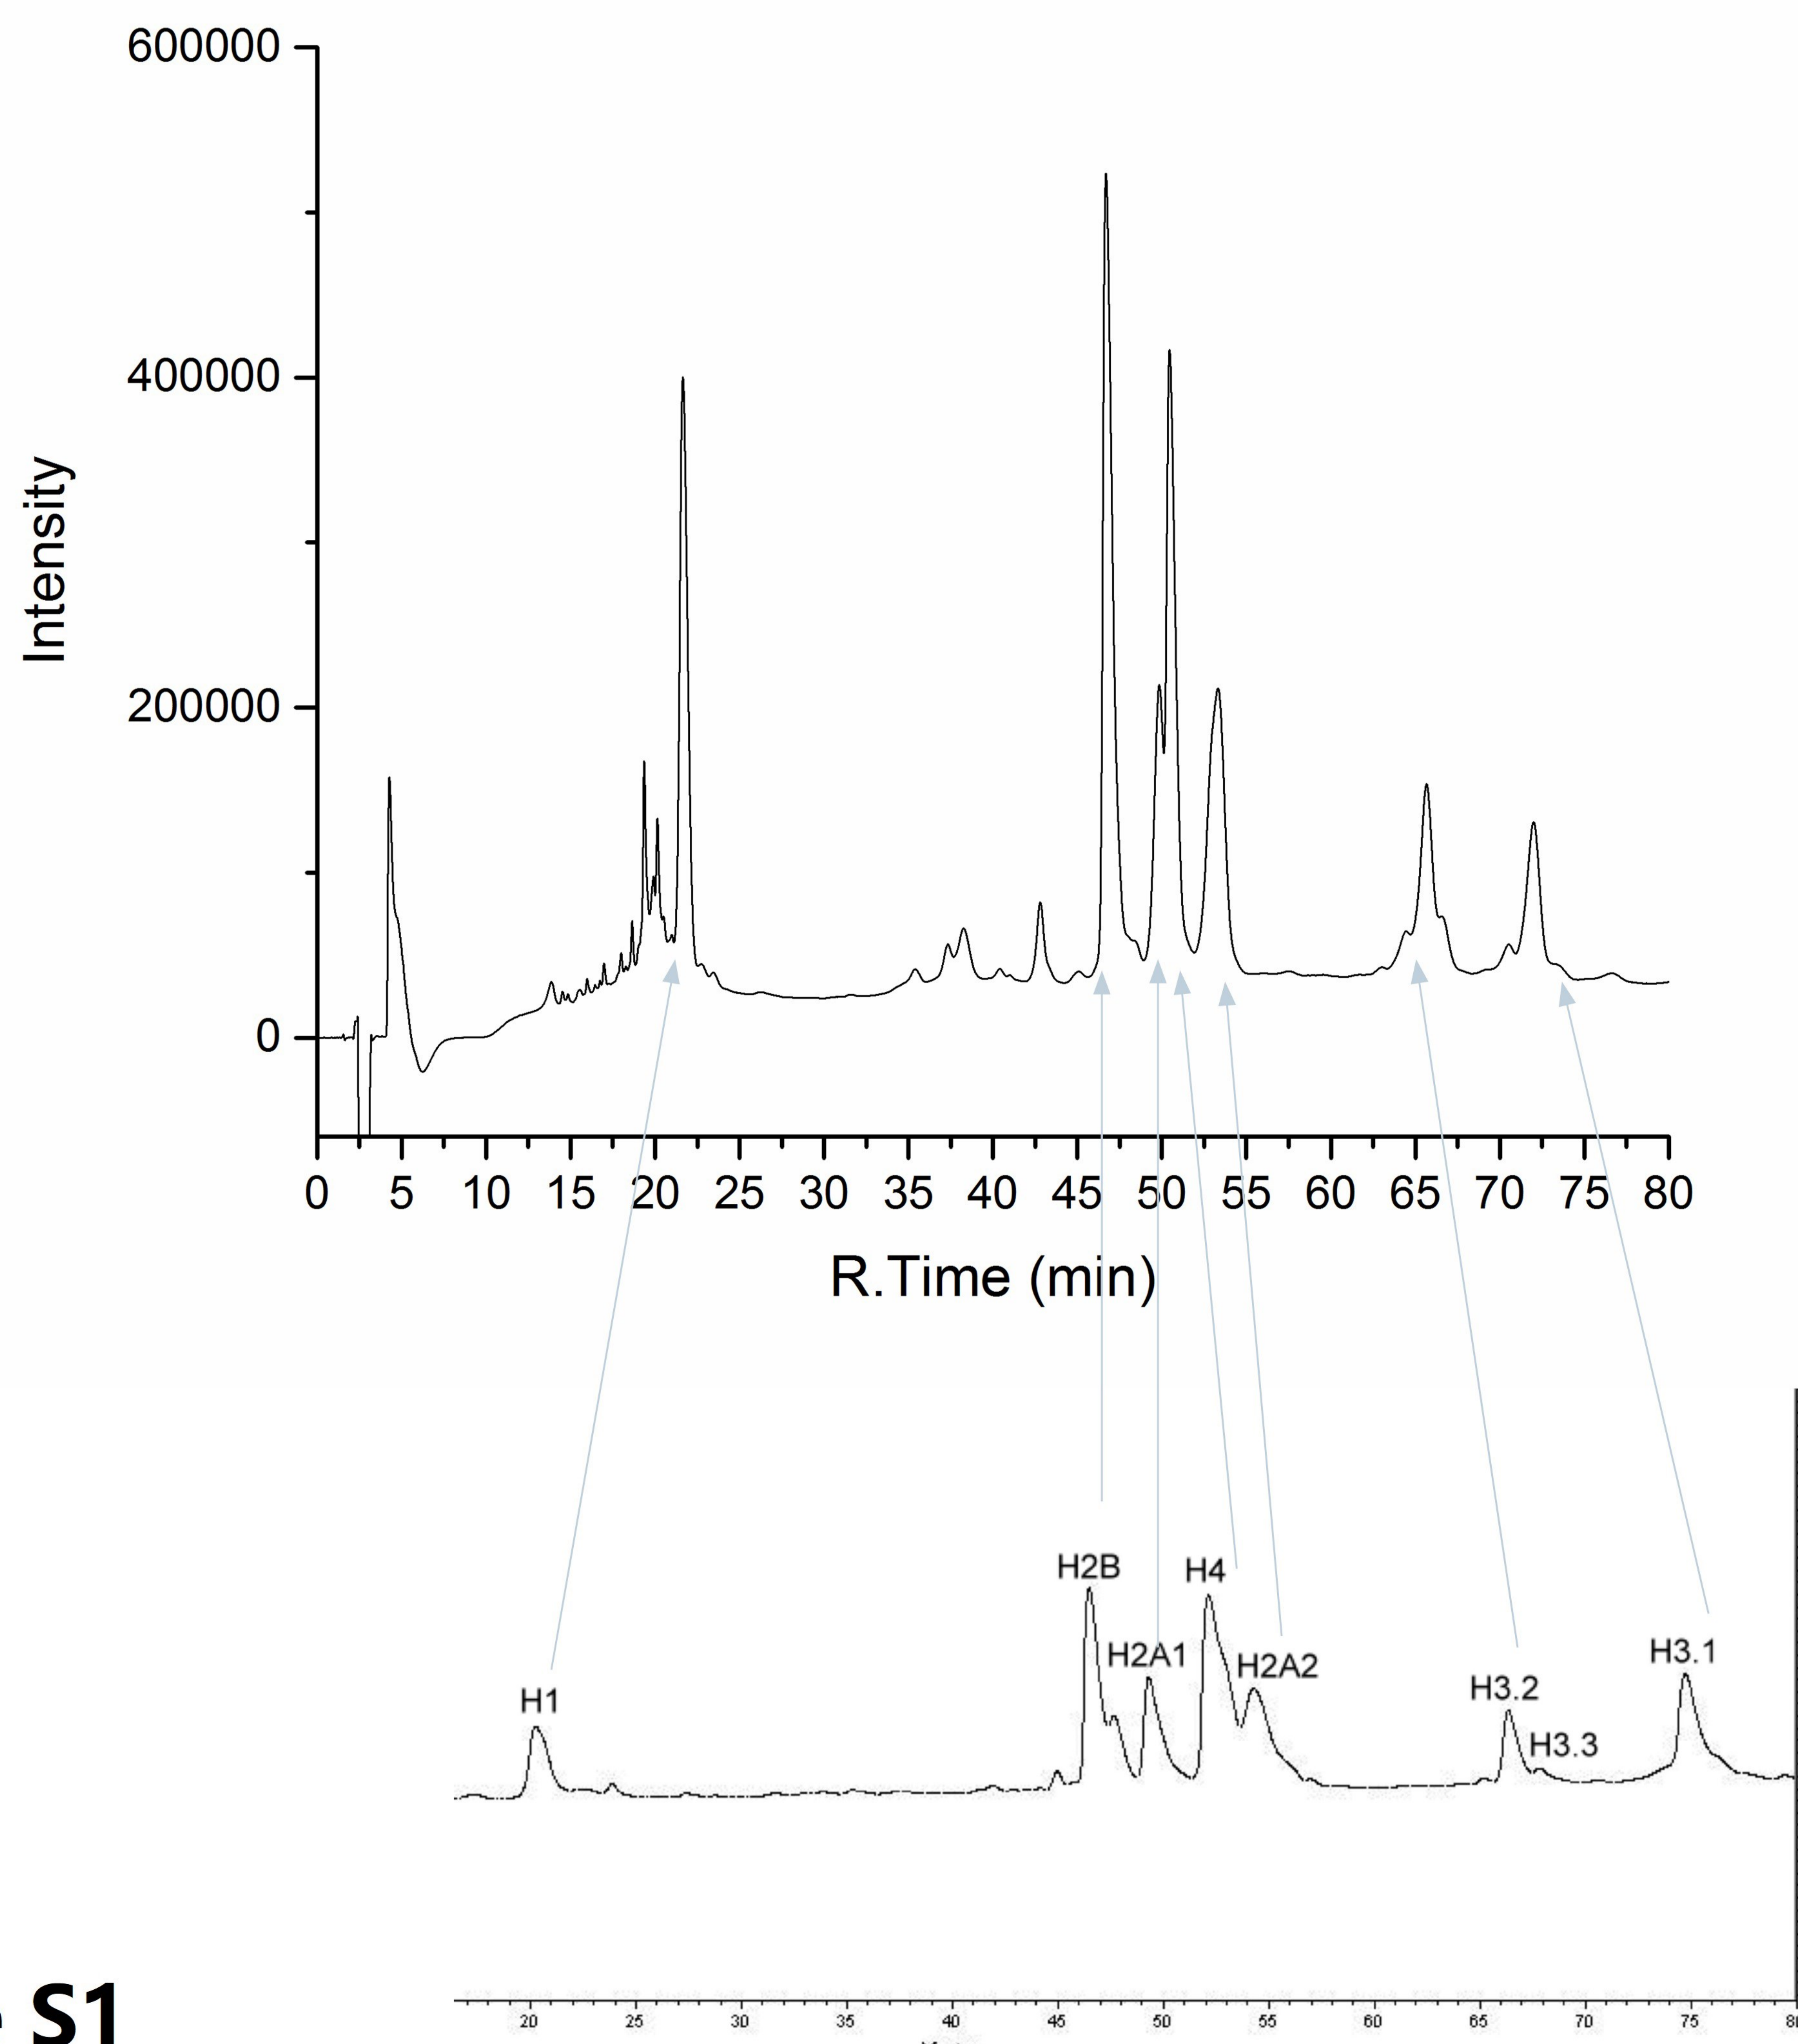

**Figure S1**

Supplement: d0ay02146f1.pdf [file d0ay02146f1.pdf]

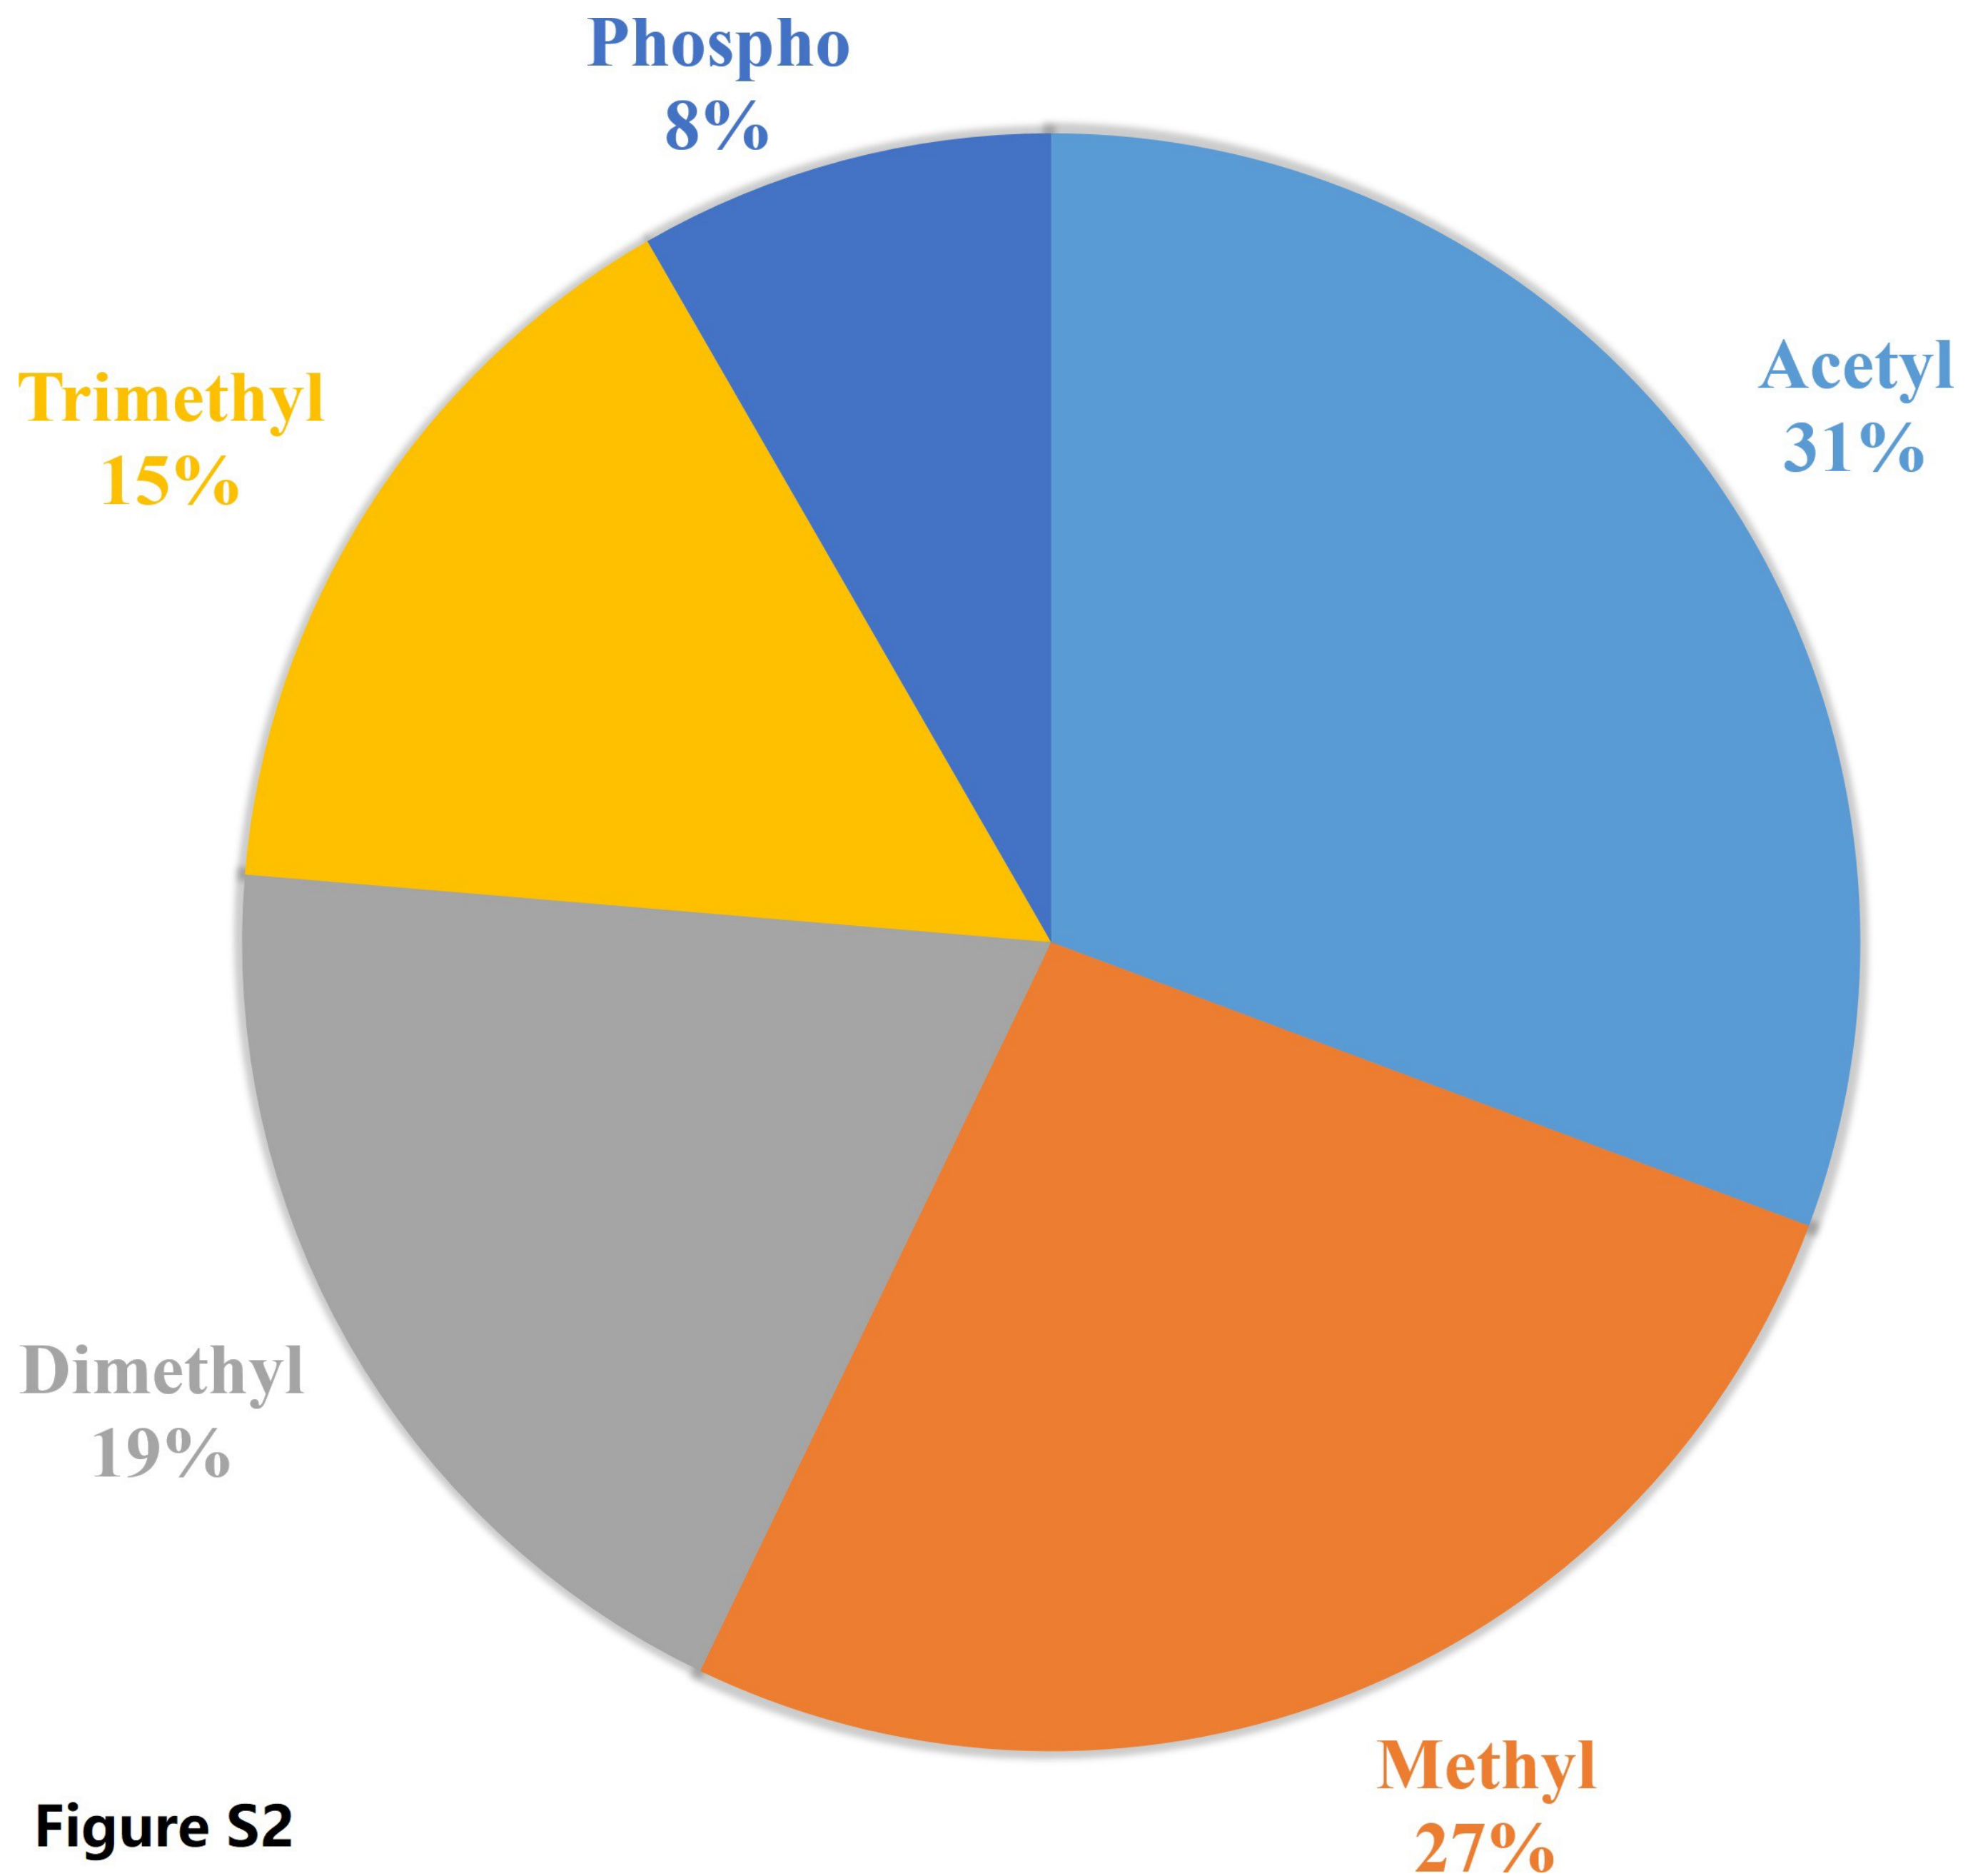

**Figure S2**

Supplement: d0ay02146f2.pdf [file d0ay02146f2.pdf]
